# Supplementary material for: New records in vascular plants alien to Kyrgyzstan
Source: Biodivers Data J. 2014 Jan 21;(2):e1018. doi: 10.3897/BDJ.2.e1018 (PMC4030214; doi:10.3897/BDJ.2.e1018)
Supplement: Supplementary material 1 — Darwin Core Archive file of new records in alien vascular plants of Kyrgyzstan [file biodiversity_data_journal-2-e1018-s001.xlsx]

## Sheet: Readme
	Global Biodiversity Information Facility
	DarwinCore Archive Species-Occurrence Data Template
	Occurrence-1_v1
Sheet Name	Purpose
Metadata	This sheet has the following sub sections. Each section has terms (in bold) and sample data.
Basic Metadata	This section is used to record the basic metadata about the resource
People and Organizations	This section is used to record the authors of the metadata and of the resource
Keywords and Coverage	This section records resource scope data
References	This section stores bibliographic references that support the data or data capture methods.
	This worksheet, when properly completed, can be transformed to a Ecological Metadata Language document using the GBIF Spreadsheet Processor that conforms to the GBIF EML Profile at http://rs.gbif.org/schema/eml-gbif-profile/dev/eml.xsd
Occurrence	This sheet is used to record species occurrence data and is suitable for recording basic natural history collections specimen records or species observations.
	The data in this worksheet conform to the DarwinCore terms and can be transformed to a DarwinCore Archive file using the GBIF spreadsheet processor
Instructions and definitions are obtained by hovering your cursor over cells with red upper-right corners.
	Select worksheets for data entry by selecting via the labeled tabs at the bottom of the screen
	Note: Please do not modify this template by adding or deleting any row or column. As this would prevent the Speadsheet Processor from getting correct values. We aim to provide a more flexible template according to feedbacks from users in the future.

## Sheet: Metadata
Basic Metadata	Required fields are listed with an asterisk (*) next to the field label							Research Project
								Title
Universally Unique Identifier (UUID)								Lead Organisation			Country
* Title								Description
* Publication Date (MM/DD/YYYY)
* Expected Citation
* Abstract or concise descripton of the dataset
Additional information
Resource Language			Metadata Language
Resource URL			Resource Logo URL
Creative Commons Licensing	cc0
People and Organizations
Note: select agent roles from pulldown list (in rows 19-30)
	First Name	Last Name	Organization	Phone	Email	Homepage	Address	City	State/Province	Country	Zip/Postal Code	* Primary Contact
* Resource Creator												Yes
* Metadata Author
Author
Author
Author
Author
Author
Author
Author
Author
Author
Author
Author
Author
Keywords and Coverage					Latitude and longitude values are used to create a 'bounding box' containing the region of interest.
Regional Scope					Bounding Box	Decimal Lat.	Decimal Long.
General Keywords					Upper Left
Keyword Thesaurus					Lower right
Begin Date or Single Date
End Date
Taxonomic Keywords
References	Use the fields below to record bibliographic citations. Copy and paste additional rows to accommodate more citations.
Reference
Reference
Reference
Reference
Reference
Reference
Reference
Reference
Reference
Reference
Reference
Collections-related	For additional documentation of natural history collections data (if applicable)
Collection Name
Collection Identifier
Parent Collection Identifier
Formation Period
Living Time Period
Specimen Preservation Method

## Sheet: Occurrence
occurrenceID	institutionCode	collectionID	collectionCode	catalogNumber	sex	kingdom	phylum	class	order	family	genus	subgenus	specificEpithet	infraspecificEpithet	scientificName	scientificNameAuthorship	taxonRank	dateIdentified	identifiedBy	typeStatus	continent	waterBody	country	stateProvince	locality	decimalLatitude	decimalLongitude	coordinatePrecision	minimumElevationInMeters	maximumElevationInMeters	minimumDepthInMeters	maximumDepthInMeters	basisOfRecord	eventDate	year	month	day	habitat	fieldNumber	recordedBy	samplingProtocol	associatedMedia	eventRemarks	modified
	FRU	13699								Asteraceae	Anthemis		ruthenica		Anthemis ruthenica	Bieb.	species	1998-01-01	G.A.Lazkov		Asia		Kyrgyzstan	Chüy Region	Northern side of Kyrgyz Ala-Too, near Belogorka [Tosh-Bulak] Village	42.6733	74.2415						specimen	1996-06-07	1996	6	7		29	M.Pimenov, E.Kluykov, G.Lazkov			alien plant
	LE	15844								Asteraceae	Anthemis		ruthenica		Anthemis ruthenica	Bieb.	species	1998-01-01	G.A.Lazkov		Asia		Kyrgyzstan	Chüy Region	Northern side of Kyrgyz Ala-Too, near Belogorka [Tosh-Bulak] Village	42.6733	74.2415						specimen	1996-06-07	1996	6	7		29	M.Pimenov, E.Kluykov, G.Lazkov			alien plant
	FRU	13699								Asteraceae	Anthemis		ruthenica		Anthemis ruthenica	Bieb.	species	1998-01-01	G.A.Lazkov		Asia		Kyrgyzstan	Chüy Region	Northern side of Kyrgyz Ala-Too, near Cholok Village	42.7493	73.5036						specimen	1965-07-21	1965	7	21		1281	anonym			alien plant
	FRU	13699								Asteraceae	Anthemis		ruthenica		Anthemis ruthenica	Bieb.	species	1998-01-01	G.A.Lazkov		Asia		Kazakhstan	Taraz Region	Vicinity of Jambyl [Taraz] Town, foothills	42.8744	71.4376						specimen	1970-05-14	1970	5	14	clayey slopes, semidesert		Sudnitsyna			alien plant
	FRU	13699								Asteraceae	Anthemis		ruthenica		Anthemis ruthenica	Bieb.	species	1998-01-01	G.A.Lazkov		Asia		Kyrgyzstan	Talas Region	Pokrovka Village	42.7297	71.607						specimen	1968-06-02	1968	6	2	roadside		R.Sultanova			alien plant
	FRU	13699								Asteraceae	Anthemis		ruthenica		Anthemis ruthenica	Bieb.	species	1998-01-01	G.A.Lazkov		Asia		Kyrgyzstan	Chüy Region	Ala-Archa River, Kashka-Suu Village	42.6739	74.5275						specimen	1998-05-01	1998	5	0			G.Lazkov			alien plant
	FRU	13699								Asteraceae	Anthemis		ruthenica		Anthemis ruthenica	Bieb.	species	1998-01-01	G.A.Lazkov		Asia		Kyrgyzstan	Chüy Region	right side of Aspara River, 4 km upstream Granitogorsk Town	42.7055	73.458						specimen	1990-05-18	1990	5	18	gravelly slope along the road		S.Sheremetova & G.Lazkov			alien plant
	FRU	13699								Asteraceae	Anthemis		ruthenica		Anthemis ruthenica	Bieb.	species	1998-01-01	G.A.Lazkov		Asia		Kyrgyzstan	Chüy Region	Kara-Balta River, Taldy-Bulak	42.6529	73.9064						specimen	1978-06-17	1978	6	17	by the road		E.S.Poliakova			alien plant
										Asteraceae	Anthemis		ruthenica		Anthemis ruthenica	Bieb.	species	1998-01-01	G.A.Lazkov		Asia		Kyrgyzstan	Chüy Region	Kant Town	42.8694	74.8419						observation	01/06/2010-01/09/2010	2010					G.Lazkov			alien plant
										Asteraceae	Anthemis		ruthenica		Anthemis ruthenica	Bieb.	species	1998-01-01	G.A.Lazkov		Asia		Kyrgyzstan	Chüy Region	Tokmok Town	42.8105	75.2758						observation	01/06/2010-01/09/2010	2010					G.Lazkov			alien plant
										Asteraceae	Anthemis		ruthenica		Anthemis ruthenica	Bieb.	species	1998-01-01	G.A.Lazkov		Asia		Kyrgyzstan	Chüy Region	Kemin Town	42.7595	75.6875						observation	01/06/2010-01/09/2010	2010					G.Lazkov			alien plant
	FRU	13699								Asteraceae	Anthemis		ruthenica		Anthemis ruthenica	Bieb.	species	2013-06-22	G.A.Lazkov		Asia		Kyrgyzstan	Chüy Region	E of Kara-Balta Town, factory area (under construction)	42.7983	73.8886						specimen	2013-06-22	2013	6	22	ruderal places		G.Lazkov			alien plant
	FRU	13699								Asteraceae	Centaurea		solstitialis		Centaurea solstitialis	L.	species	2013-08-15	G.A.Lazkov		Asia		Kyrgyzstan	Jalal-Abad Region	Fergana Range (its SW foothills), NW of Suzak Town	40.937	72.8892		865				specimen	2013-08-15	2013	8	15	Red clay hills, open slopes with sparse vegetation, planted with Pistacia	280	A. Sennikov & G. Lazkov			alien plant
	FRU	13699								Asteraceae	Centaurea		solstitialis		Centaurea solstitialis	L.	species	2000-06-24	G.A.Lazkov		Asia		Kyrgyzstan	Jalal-Abad Region	At-Oinok Mts.: Kürp-Say River ravine, by the mouth of the river	41.4921	72.3356						specimen	2000-06-24	2000	6	24	S-exposed slope		M.Pimenov, E.Kluykov, G.Lazkov			alien plant
	LE	15844								Asteraceae	Centaurea		solstitialis		Centaurea solstitialis	L.	species	2000-06-24	G.A.Lazkov		Asia		Kyrgyzstan	Jalal-Abad Region	At-Oinok Mts.: Kürp-Say River ravine, by the mouth of the river	41.4921	72.3356						specimen	2000-06-24	2000	6	24	S-exposed slope		M.Pimenov, E.Kluykov, G.Lazkov			alien plant
										Brassicaceae	Crambe		orientalis		Crambe orientalis	L.	species	2013-08-07	G.A.Lazkov		Asia		Kyrgyzstan	Talas Region	Maimak railway station, W of the station	42.6762	71.2116						observation	2013-08-07	2013	8	7	railway embankment and adjacent mountain slopes		A. Sennikov & G. Lazkov			alien plant
	FRU	13699								Brassicaceae	Crambe		orientalis		Crambe orientalis	L.	species	2006-05-23	G.A.Lazkov		Asia		Kyrgyzstan	Chüy Region	4 km NW of Ysyk-Ata Resort	42.6376	74.9348		1000				specimen	2006-05-23	2006	5	23	allotment garden		G.Lazkov			alien plant
	FRU	13699								Brassicaceae	Crambe		orientalis		Crambe orientalis	L.	species	2006-08-28	G.A.Lazkov		Asia		Kyrgyzstan	Chüy Region	Chüy Depression, railway crossing by Petrovka Village	42.8218	74.0508						specimen	2006-08-28	2006	8	28			G.Lazkov			alien plant
	FRU	13699								Brassicaceae	Crambe		orientalis		Crambe orientalis	L.	species	2006-08-28	G.A.Lazkov		Asia		Kyrgyzstan	Chüy Region	Bishkek City, by railway bridge across Manas Avenue	42.8651	74.587						specimen	2006-08-28	2006	8	28			G.Lazkov			alien plant
	FRU	13699								Brassicaceae	Crambe		orientalis		Crambe orientalis	L.	species	2006-04-28	G.A.Lazkov		Asia		Kyrgyzstan	Chüy Region	Besh-Küngöy	42.775	74.655						specimen	2006-04-28	2006	4	28	foothills		G.Lazkov			alien plant
	FRU	13699								Brassicaceae	Hirschfeldia		incana		Hirschfeldia incana	(L.) Lagr.-Foss.	species	2013-06-03	G.A.Lazkov		Asia		Kyrgyzstan	Jalal-Abad Region	Fergana Range: Kara-Ünkür River basin, Kyr-Koo Village	41.1876	72.911						specimen	2013-06-03	2013	6	3	among shrubs		G.Lazkov			alien plant
	FRU	13699								Amaranthaceae	Chenopodium		vulvaria		Chenopodium vulvaria	L.	species	2013-06-22	G.A.Lazkov		Asia		Kyrgyzstan	Chüy Region	E of Kara-Balta Town, factory area (under construction)	42.7963	73.9217						specimen	2013-06-22	2013	6	22	ruderal places		G.Lazkov			alien plant
										Amaranthaceae	Chenopodium		vulvaria		Chenopodium vulvaria	L.	species		G.A.Lazkov		Asia		Kyrgyzstan	Osh Region	Alay Range: Nookat, slopes	40.235	72.558		2000				observation							G.Lazkov			alien plant
										Papaveraceae	Glaucium		corniculatum		Glaucium corniculatum	(L.) Curt.	species	1974-01-01	V.K.Pazij		Asia		Kyrgyzstan	Chüy Region	Kant Town, as a weed on experimental fields	42.945	74.828						literature	01/01/1974-31/12/1974	1974			experimental field, weed		Manual of vascular plants of Central Asia			alien plant
	FRU	13699								Papaveraceae	Glaucium		corniculatum		Glaucium corniculatum	(L.) Curt.	species	2013-06-22	G.A.Lazkov		Asia		Kyrgyzstan	Chüy Region	E of Kara-Balta Town, factory area (under construction)	42.7983	73.8886						specimen	2013-06-22	2013	6	22	ruderal places		G.Lazkov			alien plant
										Lamiaceae	Salvia		aethiopis		Salvia aethiopis	L.	species	2011-01-01	G.A.Lazkov		Asia		Kyrgyzstan	Ysyk-Köl Region	1.5 km N of Kürmöntü Vilage	42.8161	78.2407						observation	2011-01-01	2011					D.Milko			alien plant
	FRU	13699								Lamiaceae	Salvia		aethiopis		Salvia aethiopis	L.	species	2012-06-10	G.A.Lazkov		Asia		Kyrgyzstan	Batken Region	Orozbekovo Village	40.062	71.666						specimen	2012-06-10	2012	6	10			G.Lazkov & U.Neveraev			alien plant
	FRU	13699								Lamiaceae	Salvia		aethiopis		Salvia aethiopis	L.	species	2012-07-20	G.A.Lazkov		Asia		Kyrgyzstan	Chüy Region	Kemin Village	42.78	75.71						specimen	2012-07-20	2012	7	20			G.Lazkov			alien plant
	FRU	13699								Lamiaceae	Salvia		aethiopis		Salvia aethiopis	L.	species	2013-08-07	G.A.Lazkov		Asia		Kyrgyzstan	Talas Region	Karacha-Too Mts. (E part of Kara-Tau)	42.675	71.1921		865				specimen	2013-08-07	2013	8	7	lowermost part of slopes near the railway	180	A. Sennikov & G. Lazkov			alien plant
	FRU	13699								Lamiaceae	Salvia		aethiopis		Salvia aethiopis	L.	species	2013-08-08	G.A.Lazkov		Asia		Kyrgyzstan	Talas Region	Talas Range (N side), Kolbars	42.4452	71.0498		1580				specimen	2013-08-08	2013	8	8	open semidesert slopes	196	A. Sennikov & G. Lazkov			alien plant
	FRU	13699								Poaceae	Arrhenatherum		elatius		Arrhenatherum elatius	(L.) J.Presl & C.Presl	species	2013-08-15	G.A.Lazkov		Asia		Kyrgyzstan	Ysyk-Köl Region	Vicinity of Bosteri Village	42.6464	77.1656						specimen	01/06/2013-31/06/2013	2013	6				student excursion of the Department of botany and plant physiology, Kyrgyz National University			alien plant
	FRU	13699								Poaceae	Arrhenatherum		elatius		Arrhenatherum elatius	(L.) J.Presl & C.Presl	species	2013-08-08	A.N.Sennikov		Asia		Kyrgyzstan	Talas Region	Talas Depression, Kök-Say Village	42.5101	71.1177		1220				specimen	2013-08-08	2013	8	8	Remnants of old cultivation along an artificial brook, dispersed and established	195	A. Sennikov & G. Lazkov			alien plant
	FRU	13699								Poaceae	Tragus		racemosus		Tragus racemosus	(L.) Desf.	species	2013-06-18	G.A.Lazkov		Asia		Kyrgyzstan	Chüy Region	Chüy Depression, Tokmok Town	42.857	75.29						specimen	2013-06-18	2013	6	18	side of by-pass highway		G.Lazkov			alien plant
	MW	15550								Amaranthaceae	Chenopodium		vulvaria		Chenopodium vulvaria	L.	species	1961-08-14	I.A.Gubanov		Asia		Kyrgyzstan	Chüy Region	Kara-Balta ravine	42.65	73.93						specimen	1961-08-14	1961	8	14			I.A.Gubanov			alien plant

## Sheet: Vocabularies
ISO 693-2	Language	CountryID	Country	Roles	YesNo	CC	Code	ThreatStatus	NativeStatus
abk	Abkhazian	AF	AFGHANISTAN	Originator	Yes	cc0	ICBN	Least Concern	Native
ace	Achinese	AX	ALAND ISLANDS	Content Provider	No	publicdomain	ICZN	Near Threatened	Introduced
ach	Acoli	AL	ALBANIA	Principal Investigator		by	ICNB	Vulnerable	Naturalised
ada	Adangme	DZ	ALGERIA	Editor		by-nc-sa	ICTV	Endangered	Invasive
ady	Adyghe	AS	AMERICAN SAMOA	Publisher		by-sa	BC	Critically Endangered	Managed
aar	Afar	AD	ANDORRA	Processor			ICNPC	Extinct in the Wild	Uncertain
afh	Afrihili	AO	ANGOLA	Custodian/Steward			BioCode	Extinct
afr	Afrikaans	AI	ANGUILLA	Author				Data Deficient
afa	Afro-Asiatic languages	AQ	ANTARCTICA	Metadata Provider				Not Evaluated
ain	Ainu	AG	ANTIGUA AND BARBUDA	Distributor
aka	Akan	AR	ARGENTINA	User
akk	Akkadian	AM	ARMENIA
alb	Albanian	AW	ARUBA
ale	Aleut	AU	AUSTRALIA
alg	Algonquian languages	AT	AUSTRIA
tut	Altaic languages	AZ	AZERBAIJAN
amh	Amharic	BS	BAHAMAS
anp	Angika	BH	BAHRAIN
apa	Apache languages	BD	BANGLADESH
ara	Arabic	BB	BARBADOS
arg	Aragonese	BY	BELARUS
arp	Arapaho	BE	BELGIUM
arw	Arawak	BZ	BELIZE
arm	Armenian	BJ	BENIN
rup	Aromanian	BM	BERMUDA
art	Artificial languages	BT	BHUTAN
asm	Assamese	BO	BOLIVIA
ast	Asturian	BA	BOSNIA AND HERZEGOVINA
ath	Athapascan languages	BW	BOTSWANA
aus	Australian languages	BV	BOUVET ISLAND
map	Austronesian languages	BR	BRAZIL
ava	Avaric	IO	BRITISH INDIAN OCEAN TERRITORY
ave	Avestan	BN	BRUNEI DARUSSALAM
awa	Awadhi	BG	BULGARIA
aym	Aymara	BF	BURKINA FASO
aze	Azerbaijani	BI	BURUNDI
ban	Balinese	KH	CAMBODIA
bat	Baltic languages	CM	CAMEROON
bal	Baluchi	CA	CANADA
bam	Bambara	CV	CAPE VERDE
bai	Bamileke languages	KY	CAYMAN ISLANDS
bad	Banda languages	CF	CENTRAL AFRICAN REPUBLIC
bnt	Bantu (Other)	TD	CHAD
bas	Basa	CL	CHILE
bak	Bashkir	CN	CHINA
baq	Basque	TW	CHINESE TAIPEI
btk	Batak languages	CX	CHRISTMAS ISLAND
bej	Beja	CC	COCOS (KEELING) ISLANDS
bel	Belarusian	CO	COLOMBIA
bem	Bemba	KM	COMOROS
ben	Bengali	CG	CONGO
ber	Berber languages	CD	CONGO, THE DEMOCRATIC REPUBLIC OF THE
bho	Bhojpuri	CK	COOK ISLANDS
bih	Bihari languages	CR	COSTA RICA
bik	Bikol	CI	COTE D'IVOIRE
bin	Bini	HR	CROATIA
bis	Bislama	CU	CUBA
byn	Blin	CY	CYPRUS
zbl	Blissymbols	CZ	CZECH REPUBLIC
nob	Bokmål, Norwegian	DK	DENMARK
bos	Bosnian	DJ	DJIBOUTI
bra	Braj	DM	DOMINICA
bre	Breton	DO	DOMINICAN REPUBLIC
bug	Buginese	EC	ECUADOR
bul	Bulgarian	EG	EGYPT
bua	Buriat	SV	EL SALVADOR
bur	Burmese	GQ	EQUATORIAL GUINEA
cad	Caddo	ER	ERITREA
cat	Catalan	EE	ESTONIA
cau	Caucasian languages	ET	ETHIOPIA
ceb	Cebuano	FK	FALKLAND ISLANDS (MALVINAS)
cel	Celtic languages	FO	FAROE ISLANDS
cai	Central American Indian languages	FJ	FIJI
khm	Central Khmer	FI	FINLAND
chg	Chagatai	FR	FRANCE
cmc	Chamic languages	GF	FRENCH GUIANA
cha	Chamorro	PF	FRENCH POLYNESIA
che	Chechen	TF	FRENCH SOUTHERN TERRITORIES
chr	Cherokee	GA	GABON
chy	Cheyenne	GM	GAMBIA
chb	Chibcha	GE	GEORGIA
nya	Chichewa	DE	GERMANY
chi	Chinese	GH	GHANA
chn	Chinook jargon	GI	GIBRALTAR
chp	Chipewyan	GR	GREECE
cho	Choctaw	GL	GREENLAND
chu	Church Slavic	GD	GRENADA
chk	Chuukese	GP	GUADELOUPE
chv	Chuvash	GU	GUAM
nwc	Classical Newari	GT	GUATEMALA
syc	Classical Syriac	GG	GUERNSEY
cop	Coptic	GN	GUINEA
cor	Cornish	GW	GUINEA-BISSAU
cos	Corsican	GY	GUYANA
cre	Cree	HT	HAITI
mus	Creek	HM	HEARD ISLAND AND MCDONALD ISLANDS
crp	Creoles and pidgins	HN	HONDURAS
cpe	Creoles and pidgins, English based	HK	HONG KONG
cpf	Creoles and pidgins, French-based	HU	HUNGARY
cpp	Creoles and pidgins, Portuguese-based	IS	ICELAND
crh	Crimean Tatar	IN	INDIA
hrv	Croatian	ID	INDONESIA
cus	Cushitic languages	IR	IRAN (ISLAMIC REPUBLIC OF)
cze	Czech	IQ	IRAQ
dak	Dakota	IE	IRELAND
dan	Danish	IM	ISLE OF MAN
dar	Dargwa	IL	ISRAEL
del	Delaware	IT	ITALY
din	Dinka	JM	JAMAICA
div	Divehi	JP	JAPAN
doi	Dogri	JE	JERSEY
dgr	Dogrib	JO	JORDAN
dra	Dravidian languages	KZ	KAZAKHSTAN
dua	Duala	KE	KENYA
dut	Dutch	KI	KIRIBATI
dum	Dutch, Middle (ca.1050-1350)	KP	KOREA, DEMOCRATIC PEOPLE'S REPUBLIC OF
dyu	Dyula	KR	KOREA, REPUBLIC OF
dzo	Dzongkha	KW	KUWAIT
frs	Eastern Frisian	KG	KYRGYZSTAN
efi	Efik	LA	LAO PEOPLE'S DEMOCRATIC REPUBLIC
egy	Egyptian (Ancient)	LV	LATVIA
eka	Ekajuk	LB	LEBANON
elx	Elamite	LS	LESOTHO
eng	English	LR	LIBERIA
enm	English, Middle (1100-1500)	LY	LIBYAN ARAB JAMAHIRIYA
ang	English, Old (ca.450-1100)	LI	LIECHTENSTEIN
myv	Erzya	LT	LITHUANIA
epo	Esperanto	LU	LUXEMBOURG
est	Estonian	MO	MACAO
ewe	Ewe	MK	MACEDONIA, THE FORMER YUGOSLAV REPUBLIC OF
ewo	Ewondo	MG	MADAGASCAR
fan	Fang	MW	MALAWI
fat	Fanti	MY	MALAYSIA
fao	Faroese	MV	MALDIVES
fij	Fijian	ML	MALI
fil	Filipino	MT	MALTA
fin	Finnish	MH	MARSHALL ISLANDS
fiu	Finno-Ugrian languages	MQ	MARTINIQUE
fon	Fon	MR	MAURITANIA
fre	French	MU	MAURITIUS
frm	French, Middle (ca.1400-1600)	YT	MAYOTTE
fro	French, Old (842-ca.1400)	MX	MEXICO
fur	Friulian	FM	MICRONESIA, FEDERATED STATES OF
ful	Fulah	MD	MOLDOVA, REPUBLIC OF
gaa	Ga	MC	MONACO
gla	Gaelic	MN	MONGOLIA
car	Galibi Carib	ME	MONTENEGRO
glg	Galician	MS	MONTSERRAT
lug	Ganda	MA	MOROCCO
gay	Gayo	MZ	MOZAMBIQUE
gba	Gbaya	MM	MYANMAR
gez	Geez	NA	NAMIBIA
geo	Georgian	NR	NAURU
ger	German	NP	NEPAL
gmh	German, Middle High (ca.1050-1500)	NL	NETHERLANDS
goh	German, Old High (ca.750-1050)	AN	NETHERLANDS ANTILLES
gem	Germanic languages	NC	NEW CALEDONIA
gil	Gilbertese	NZ	NEW ZEALAND
gon	Gondi	NI	NICARAGUA
gor	Gorontalo	NE	NIGER
got	Gothic	NG	NIGERIA
grb	Grebo	NU	NIUE
grc	Greek, Ancient (to 1453)	NF	NORFOLK ISLAND
gre	Greek, Modern (1453-)	MP	NORTHERN MARIANA ISLANDS
grn	Guarani	NO	NORWAY
guj	Gujarati	OM	OMAN
gwi	Gwich'in	PK	PAKISTAN
hai	Haida	PW	PALAU
hat	Haitian	PS	PALESTINIAN TERRITORY, OCCUPIED
hau	Hausa	PA	PANAMA
haw	Hawaiian	PG	PAPUA NEW GUINEA
heb	Hebrew	PY	PARAGUAY
her	Herero	PE	PERU
hil	Hiligaynon	PH	PHILIPPINES
him	Himachali languages	PN	PITCAIRN
hin	Hindi	PL	POLAND
hmo	Hiri Motu	PT	PORTUGAL
hit	Hittite	PR	PUERTO RICO
hmn	Hmong	QA	QATAR
hun	Hungarian	RE	REUNION
hup	Hupa	RO	ROMANIA
iba	Iban	RU	RUSSIAN FEDERATION
ice	Icelandic	RW	RWANDA
ido	Ido	BL	SAINT BARTHELEMY
ibo	Igbo	SH	SAINT HELENA
ijo	Ijo languages	KN	SAINT KITTS AND NEVIS
ilo	Iloko	LC	SAINT LUCIA
smn	Inari Sami	PM	SAINT PIERRE AND MIQUELON
inc	Indic languages	VC	SAINT VINCENT AND THE GRENADINES
ine	Indo-European languages	WS	SAMOA
ind	Indonesian	SM	SAN MARINO
inh	Ingush	ST	SAO TOME AND PRINCIPE
ina	Interlingua (International Auxiliary Language Association)	SA	SAUDI ARABIA
ile	Interlingue	SN	SENEGAL
iku	Inuktitut	RS	SERBIA
ipk	Inupiaq	SC	SEYCHELLES
ira	Iranian languages	SL	SIERRA LEONE
gle	Irish	SG	SINGAPORE
mga	Irish, Middle (900-1200)	SK	SLOVAKIA
sga	Irish, Old (to 900)	SI	SLOVENIA
iro	Iroquoian languages	SB	SOLOMON ISLANDS
ita	Italian	SO	SOMALIA
jpn	Japanese	ZA	SOUTH AFRICA
jav	Javanese	GS	SOUTH GEORGIA AND THE SOUTH SANDWICH ISLANDS
jrb	Judeo-Arabic	ES	SPAIN
jpr	Judeo-Persian	LK	SRI LANKA
kbd	Kabardian	SD	SUDAN
kab	Kabyle	SR	SURINAME
kac	Kachin	SJ	SVALBARD AND JAN MAYEN
kal	Kalaallisut	SZ	SWAZILAND
xal	Kalmyk	SE	SWEDEN
kam	Kamba	CH	SWITZERLAND
kan	Kannada	SY	SYRIAN ARAB REPUBLIC
kau	Kanuri	TJ	TAJIKISTAN
kaa	Kara-Kalpak	TZ	TANZANIA, UNITED REPUBLIC OF
krc	Karachay-Balkar	TH	THAILAND
krl	Karelian	TL	TIMOR-LESTE
kar	Karen languages	TG	TOGO
kas	Kashmiri	TK	TOKELAU
csb	Kashubian	TO	TONGA
kaw	Kawi	TT	TRINIDAD AND TOBAGO
kaz	Kazakh	TN	TUNISIA
kha	Khasi	TR	TURKEY
khi	Khoisan languages	TM	TURKMENISTAN
kho	Khotanese	TC	TURKS AND CAICOS ISLANDS
kik	Kikuyu	TV	TUVALU
kmb	Kimbundu	UG	UGANDA
kin	Kinyarwanda	UA	UKRAINE
kir	Kirghiz	AE	UNITED ARAB EMIRATES
tlh	Klingon	GB	UNITED KINGDOM
kom	Komi	US	UNITED STATES
kon	Kongo	UM	UNITED STATES MINOR OUTLYING ISLANDS
kok	Konkani	UY	URUGUAY
kor	Korean	UZ	UZBEKISTAN
kos	Kosraean	VU	VANUATU
kpe	Kpelle	VA	VATICAN CITY STATE (HOLY SEE)
kro	Kru languages	VE	VENEZUELA
kua	Kuanyama	VN	VIET NAM
kum	Kumyk	VG	VIRGIN ISLANDS (BRITISH)
kur	Kurdish	VI	VIRGIN ISLANDS (U.S.)
kru	Kurukh	WF	WALLIS AND FUTUNA
kut	Kutenai	EH	WESTERN SAHARA
lad	Ladino	YE	YEMEN
lah	Lahnda	YU	YUGOSLAVIA
lam	Lamba	ZM	ZAMBIA
day	Land Dayak languages	ZW	ZIMBABWE
lao	Lao
lat	Latin
lav	Latvian
lez	Lezghian
lim	Limburgan
lin	Lingala
lit	Lithuanian
jbo	Lojban
nds	Low German
dsb	Lower Sorbian
loz	Lozi
lub	Luba-Katanga
lua	Luba-Lulua
lui	Luiseno
smj	Lule Sami
lun	Lunda
luo	Luo (Kenya and Tanzania)
lus	Lushai
ltz	Luxembourgish
mac	Macedonian
mad	Madurese
mag	Magahi
mai	Maithili
mak	Makasar
mlg	Malagasy
may	Malay
mal	Malayalam
mlt	Maltese
mnc	Manchu
mdr	Mandar
man	Mandingo
mni	Manipuri
mno	Manobo languages
glv	Manx
mao	Maori
arn	Mapudungun
mar	Marathi
chm	Mari
mah	Marshallese
mwr	Marwari
mas	Masai
myn	Mayan languages
men	Mende
mic	Mi'kmaq
min	Minangkabau
mwl	Mirandese
moh	Mohawk
mdf	Moksha
mkh	Mon-Khmer languages
lol	Mongo
mon	Mongolian
mos	Mossi
mul	Multiple languages
mun	Munda languages
nqo	N'Ko
nah	Nahuatl languages
nau	Nauru
nav	Navajo
nde	Ndebele, North
nbl	Ndebele, South
ndo	Ndonga
nap	Neapolitan
new	Nepal Bhasa
nep	Nepali
nia	Nias
nic	Niger-Kordofanian languages
ssa	Nilo-Saharan languages
niu	Niuean
zxx	No linguistic content
nog	Nogai
non	Norse, Old
nai	North American Indian languages
frr	Northern Frisian
sme	Northern Sami
nor	Norwegian
nno	Norwegian Nynorsk
nub	Nubian languages
nym	Nyamwezi
nyn	Nyankole
nyo	Nyoro
nzi	Nzima
oci	Occitan (post 1500)
arc	Official Aramaic (700-300 BCE)
oji	Ojibwa
ori	Oriya
orm	Oromo
osa	Osage
oss	Ossetian
oto	Otomian languages
pal	Pahlavi
pau	Palauan
pli	Pali
pam	Pampanga
pag	Pangasinan
pan	Panjabi
pap	Papiamento
paa	Papuan languages
nso	Pedi
per	Persian
peo	Persian, Old (ca.600-400 B.C.)
phi	Philippine languages
phn	Phoenician
pon	Pohnpeian
pol	Polish
por	Portuguese
pra	Prakrit languages
pro	ProvenÃ§al, Old (to 1500)
pus	Pushto
que	Quechua
raj	Rajasthani
rap	Rapanui
rar	Rarotongan
qaa-qtz	Reserved for local use
roa	Romance languages
rum	Romanian
roh	Romansh
rom	Romany
run	Rundi
rus	Russian
sal	Salishan languages
sam	Samaritan Aramaic
smi	Sami languages
smo	Samoan
sad	Sandawe
sag	Sango
san	Sanskrit
sat	Santali
srd	Sardinian
sas	Sasak
sco	Scots
sel	Selkup
sem	Semitic languages
srp	Serbian
srr	Serer
shn	Shan
sna	Shona
iii	Sichuan Yi
scn	Sicilian
sid	Sidamo
sgn	Sign Languages
bla	Siksika
snd	Sindhi
sin	Sinhala
sit	Sino-Tibetan languages
sio	Siouan languages
sms	Skolt Sami
den	Slave (Athapascan)
sla	Slavic languages
slo	Slovak
slv	Slovenian
sog	Sogdian
som	Somali
son	Songhai languages
snk	Soninke
wen	Sorbian languages
sot	Sotho, Southern
sai	South American Indian (Other)
alt	Southern Altai
sma	Southern Sami
spa	Spanish
srn	Sranan Tongo
suk	Sukuma
sux	Sumerian
sun	Sundanese
sus	Susu
swa	Swahili
ssw	Swati
swe	Swedish
gsw	Swiss German
syr	Syriac
tgl	Tagalog
tah	Tahitian
tai	Tai languages
tgk	Tajik
tmh	Tamashek
tam	Tamil
tat	Tatar
tel	Telugu
ter	Tereno
tet	Tetum
tha	Thai
tib	Tibetan
tig	Tigre
tir	Tigrinya
tem	Timne
tiv	Tiv
tli	Tlingit
tpi	Tok Pisin
tkl	Tokelau
tog	Tonga (Nyasa)
ton	Tonga (Tonga Islands)
tsi	Tsimshian
tso	Tsonga
tsn	Tswana
tum	Tumbuka
tup	Tupi languages
tur	Turkish
ota	Turkish, Ottoman (1500-1928)
tuk	Turkmen
tvl	Tuvalu
tyv	Tuvinian
twi	Twi
udm	Udmurt
uga	Ugaritic
uig	Uighur
ukr	Ukrainian
umb	Umbundu
mis	Uncoded languages
und	Undetermined
hsb	Upper Sorbian
urd	Urdu
uzb	Uzbek
vai	Vai
ven	Venda
vie	Vietnamese
vol	Volapük
vot	Votic
wak	Wakashan languages
wal	Walamo
wln	Walloon
war	Waray
was	Washo
wel	Welsh
fry	Western Frisian
wol	Wolof
xho	Xhosa
sah	Yakut
yao	Yao
yap	Yapese
yid	Yiddish
yor	Yoruba
ypk	Yupik languages
znd	Zande languages
zap	Zapotec
zza	Zaza
zen	Zenaga
zha	Zhuang
zul	Zulu
zun	Zuni
